# Supplementary material for: Physiological response of the cold-water coral Desmophyllum dianthus to thermal stress and ocean acidification
Source: PeerJ. 2016 Feb 2;4:e1606. doi: 10.7717/peerj.1606 (PMC4741066; doi:10.7717/peerj.1606)
Supplement: Data S1 [file peerj-04-1606-s001.xlsx]

## Sheet: Raw data
Raw data - Changes in ammonium, oxigen and calcium carbonate after 6 h incubation. Changes in oxigen values were converted to equivalent changes in carbon
values (C = 0.8 · O2, Muscatine et al. 1981)
Temperature	pCO2		Nubbin surface		Ammonium excretion		Respiration			Calcification
					Δ NH4		Δ O2	Δ C		Δ CaCO3
(ºC)	(ppm)		(cm2)		(μmol)		(μmol)	(μmol)		(μmol)
12	390	coral 1	29.9		1.66		12.64	10.12		6.85
12	390	coral 2	11.9		0.77		25.10	20.08		4.78
12	390	coral 3	9.2		0.94		8.04	6.43		2.77
12	390	control	-		0.00		1.52	1.22		-0.06
12	750	coral 4	19.0		0.99		37.01	29.61		3.23
12	750	coral 5	9.2		0.89		35.35	28.28		2.77
12	750	coral 6	5.6		0.74		19.29	15.43		1.61
12	750	control	-		0.01		7.4	5.92		-1.89
15	390	coral 7	33.9		1.87		58.80	47.04		2.30
15	390	coral 8	18.3		1.50		36.53	29.22		4.90
15	390	coral 9	18.6		1.82		60.45	48.36		1.69
15	390	control	-		-0.04		6.12	4.90		-0.09
15	750	coral 10	20.2		1.10		21.60	17.28		2.63
15	750	coral 11	12.2		0.84		8.47	6.77		4.37
15	750	coral 12	11.4		0.44		5.92	4.74		1.97
15	750	control	-		-0.01		5.19	4.15		0.29
